1 **Transcriptome analysis of diverse *Plasmodium falciparum* clinical isolates**  
2 **identifies genes correlating with highly variable expression of merozoite**  
3 **surface protein MSPDBL2**

4

5 Suzanne E. Hocking<sup>1</sup>, Lindsay B. Stewart<sup>1</sup>, Sarah J. Tarr<sup>1</sup>, Aline Freville<sup>1</sup>, Kevin K. A. Tetteh  
6 <sup>1</sup>, Ambroise D. Ahouidi<sup>2</sup>, Alfred Amambua-Ngwa<sup>3</sup>, Mahamadou Diakite<sup>4</sup>, Gordon A.  
7 Awandare<sup>5</sup>, David J. Conway<sup>1\*</sup>

8

9 <sup>1</sup> Department of Infection Biology, London School of Hygiene and Tropical Medicine, Keppel  
10 St, London WC1E 7HT

11 <sup>2</sup> Le Dantec Hospital, Université Cheikh Anta Diop, Dakar, Senegal

12 <sup>3</sup> MRC Unit The Gambia at London School of Hygiene and Tropical Medicine (LSHTM), Fajara,  
13 Banjul, The Gambia

14 <sup>4</sup> Malaria Research and Training Center, University of Bamako, Mali

15 <sup>5</sup> West African Centre for Cell Biology of Infectious Pathogens, Department of Biochemistry,  
16 Cell and Molecular Biology, University of Ghana, Legon, Ghana

17

18 \* Corresponding : Email [david.conway@lshtm.ac.uk](mailto:david.conway@lshtm.ac.uk) ; Phone + 44 20 7927 2331.

19

20 Running title: Variable merozoite protein and transcriptome

21 **Abstract**

22 The merozoite surface protein MSPDBL2 of *Plasmodium falciparum* is under strong  
23 balancing selection and is a target of naturally acquired antibodies. Remarkably, MSPDBL2 is  
24 expressed in only a minority of mature schizonts of any cultured parasite line, and *mSPDBL2*  
25 gene transcription increases in response to overexpression of the gametocyte development  
26 inducer GDV1, so it is important to understand its natural expression. Here, MSPDBL2 in  
27 mature schizonts was analysed in the first *ex vivo* culture cycle of 96 clinical isolates from  
28 four populations with varying levels of infection endemicity in different West African  
29 countries, by immunofluorescence microscopy with antibodies against a conserved region  
30 of the protein. In most isolates, less than 1% of mature schizonts were positive for MSPDBL2  
31 (median of 0.6% overall), but the frequency distribution was highly skewed as nine isolates  
32 had more than 3% schizonts positive and one had 73% positive. To investigate whether  
33 expression of other gene loci correlated with MSPDBL2 expression, whole transcriptome  
34 sequencing was performed on schizont-enriched material from 17 of the clinical isolates  
35 with a wide range of proportions of schizonts positive. Transcripts of particular parasite  
36 genes were highly significantly positively correlated with MSPDBL2 positivity in schizonts as  
37 well as with *mSPDBL2* gene transcript levels, with overrepresentation of genes previously  
38 implicated as likely to be involved in gametocytogenesis, but not including the  
39 gametocytogenesis master regulator *ap2g*. Although MSPDBL2 is apparently not directly  
40 involved in sexual commitment, it marks a co-occurring developmental subpopulation that  
41 may be functionally distinct within blood stage infections.

## 42 **Introduction**

43

44 The *Plasmodium falciparum* merozoite surface protein MSPDBL2 is one of two MSP3-like  
45 proteins with a duffy-binding like (DBL) domain, expressed in schizonts and co-localised with  
46 MSP1 on the merozoite cell surface (1, 2). MSPDBL2 is not directly membrane-bound, but  
47 appears complexed with MSP1, and can bind to the surface of uninfected erythrocytes (1),  
48 suggesting a potential role in invasion. The *mispdbl2* gene occurs at a single locus on  
49 chromosome 10 with an intact coding sequence in all *P. falciparum* isolates, although it has  
50 multiple stop codons in the related chimpanzee parasite *P. reichenowi* indicating that it is  
51 not functional in that species (3, 4), and an orthologue only exists within members of the  
52 *Laverania* sub-genus but not in other malaria parasites (5). The gene is highly polymorphic  
53 within *P. falciparum*, and analysis of allele frequency distributions in endemic populations  
54 indicates that diverse alleles are maintained by strong balancing selection (3, 6, 7),  
55 suggesting that it may be a target of immune selection.

56

57 MSPDBL2 is a target of naturally acquired antibody responses, and an endemic population  
58 cohort study indicates some association with reduced prospective risk of clinical malaria (8),  
59 while another study showing purified IgG inhibits parasites in culture (9). However, the  
60 vaccine candidacy of MSPDBL2 is uncertain, as it is not only polymorphic but also highly  
61 variable in expression. Analysis of schizont-rich cultures of clinical isolates and long-term  
62 adapted *P. falciparum* laboratory lines has revealed very low *mispdbl2* transcript levels in  
63 most isolates assayed by RT-qPCR (6), or by whole transcriptome analysis (10). Strikingly,  
64 MSPDBL2 protein expression is restricted to a small proportion of mature schizonts in each  
65 laboratory-adapted parasite line tested by immunofluorescence with specific antibodies (6),  
66 although frequencies of MSPDBL2 expression in schizonts of clinical isolates have not been  
67 reported. Consistent with being expressed in only a small minority of parasites,  
68 experimental disruption of the *mispdbl2* gene does not affect overall asexual parasite growth  
69 rates in culture (11).

70

71 If MSPDBL2 is restricted to a functionally-important parasite subpopulation, it might still be  
72 a target to be considered for vaccination. Interestingly, MSPDBL2 has been shown to bind to  
73 the Fc region of IgM, although the function of this is unknown (12). Separately,

74 overexpression of *mSPDBL2* has been reported to enhance parasite survival in the presence  
75 of some antimalarial drugs in culture (13). Significantly, it has been suggested that *mSPDBL2*  
76 expression may be correlated with parasite sexual differentiation, as over-expression of the  
77 *gDv1* gene in an engineered parasite clone results in marked increase in transcription of  
78 *mSPDBL2* as well as genes known to be involved in switching to gametocyte development  
79 (14). This indicates the importance of studying variation in *mSPDBL2* gene expression as well  
80 as MSPDBL2 protein expression in schizonts of clinical isolates, and explore whether this is  
81 associated with markers of parasite commitment to gametocyte development *in vivo*. It is  
82 clear that there is great variation in proportions of parasites committed to gametocyte  
83 development among different infections from a single endemic area (15), and transcript  
84 markers of ring stage parasites that will develop as gametocytes (16), but apart from the  
85 master regulator transcription factor AP2-G (17) there are no confirmed markers of sexually  
86 committed schizonts in the previous cycle (18, 19). This study investigates the frequency  
87 distribution of expression of MSPDBL2 protein in schizonts of clinical isolates from endemic  
88 populations, and tests for correlations with other genes expressed in clinical isolate  
89 transcriptomes, including those previously implicated as associated with the  
90 gametocytogenesis pathway.

91

## 92 **Materials and Methods**

### 93 ***P. falciparum* clinical isolates**

94 For analysis of parasite phenotypic and expression variation in natural infections, clinical  
95 malaria cases attending local health facilities in Ghana (Kintampo), Mali (Nioro du Sahel),  
96 Senegal (Pikine), and The Gambia (Basse) were investigated. The level of malaria infection  
97 endemicity varied among these different populations in West Africa, being higher at the  
98 sites in Ghana and Mali than the sites in Senegal and The Gambia, which is also reflected in  
99 more complex mixed genome *P. falciparum* infections at the more highly endemic sites, as  
100 previously shown for these populations (20). Patients aged between 2 and 14 years were  
101 eligible if they had uncomplicated clinical malaria, had not taken antimalarial drugs in the 72  
102 hours preceding sample collection and tested positive for *P. falciparum* malaria by lateral  
103 flow rapid diagnostic test and slide microscopy. Written informed consent was obtained  
104 from parents or legal guardians of participating children and additional assent was received  
105 from participating children. Up to 5ml of venous blood was collected in heparinised anti-

106 coagulation BD Vacutainer® tubes (BD Biosciences), and a proportion of the erythrocytes  
107 were cryopreserved in glycerolyte and stored at -80°C or in liquid nitrogen before shipment  
108 on dry ice to the London School of Hygiene and Tropical Medicine for subsequent culture  
109 and laboratory analysis. Ethical approval for the collection and analysis of clinical samples  
110 was granted by the Ethics Committees of the Ministry of Health in Senegal, the Ministry of  
111 Health in Mali, the Ghana Health Service, the Noguchi Memorial Institute for Medical  
112 Research, University of Ghana, Kintampo Health Research Centre, MRC Gambia, and the  
113 London School of Hygiene and Tropical Medicine.

114

#### 115 ***P. falciparum* schizont preparations from the first cycle of *ex vivo* culture**

116 The clinical blood samples were thawed in batches of eight at a time and introduced into  
117 culture *ex vivo*, all isolates being processed in culture in a single laboratory, as described for  
118 a previous study of the first *ex vivo* malaria parasite generation from similar clinical samples  
119 (21). Giemsa-stained thin blood films were prepared for each isolate initially upon thawing,  
120 and later during the second day of culture to assess the developmental progression of  
121 parasites into schizogony. Isolates containing schizonts in culture on the second day after  
122 thawing were enriched for schizonts by magnetic MACS® separation, and parasites were  
123 then allowed to mature in the presence of E64 for 4 hours to prevent schizont rupture,  
124 following which cells were harvested by centrifugation, using methods similar to those  
125 previously applied to studies of schizonts in continuously cultured parasite lines (10).  
126 Erythrocytes containing matured schizonts were prepared for immunofluorescence assays  
127 by washing and resuspending in 1% BSA and spotting into individual wells of 12-well slides  
128 (Hendley-Essex), air dried and stored with desiccant at -40°C until assay, as performed in  
129 previous analysis of schizonts in cultured parasite lines (6).

130

#### 131 **Analysis of MSPDBL2 expression in schizonts by immunofluorescence**

132 Staining of schizonts positive for MSPDBL2 by immunofluorescence was performed with the  
133 identical method previously used on laboratory-adapted *P. falciparum* isolates, involving  
134 incubation with polyclonal mouse serum specific for the conserved N-terminal portion of  
135 MSPDBL2, and goat anti-mouse IgG Alexa Fluor® 555 secondary antibody, with Vectashield®  
136 mounting fluid containing DAPI to visualise nuclei (6). For each isolate, approximately 1000  
137 mature schizonts (each containing at least 8 nuclei) were counted using DAPI and scored for

138 MSPDBL2 expression using a manual Leica fluorescence microscope with a 100x objective.  
139 MSPDBL2 expression was always clearly brightly positive or entirely negative in each  
140 individual mature schizont, so that counts of numbers and proportions positive in each  
141 preparation were recorded, using same process as described previously (6).

142

#### 143 **RNA-seq of schizont-enriched samples of clinical isolates**

144 Parasite schizont-enriched material from individual isolates was stored in either TRIzol® or  
145 RNA<sup>later</sup>™ (Thermo Fisher Scientific, MA, USA), and RNA was extracted by phenol-  
146 chloroform and cleaned up using the NucleoSpin® RNA XS extraction kit (Macherey-Nagel,  
147 Germany). Samples showing successful RNA extraction after checking by Bioanalyzer  
148 electrophoresis were reverse transcribed and cDNA amplified using the SmartSeq® v4 Ultra®  
149 Low Input RNA Kit for Sequencing (Takara Bio. Inc., Shiga Prefecture, Japan). Successfully  
150 amplified samples were prepared for paired end short-read sequencing using the Nextera  
151 XT Library Prep kit (Illumina, California, USA), individual libraries being pooled in equimolar  
152 amounts at 4nM with up to 12 per pool, and sequencing was performed on an Illumina  
153 MiSeq using the 150-cycle MiSeq reagent kit v3. RNA from isolate INV236 which had the  
154 highest proportion of MSPDBL2-positive schizonts (73%) was prepared and sequenced as a  
155 priority, and following this RNA was extracted from 38 other isolates with varying  
156 proportions of MSPDBL2-positive schizonts, of which 25 showed expected cDNA size range  
157 profile after reverse transcription and amplification, and 16 of these were selected for  
158 sequencing as they had RNA quality RIN score > 6. This yielded a set of 17 isolates with RNA-  
159 seq data and matched IFA data on proportions of MSPDBL2-positive schizonts.

160

161 Following procedures previously used for RNA-seq analysis of schizont-enriched *P.*  
162 *falciparum* cultures of other isolates (10), whole transcriptome short read sequence data  
163 were assembled by alignment mapping to the *P. falciparum* 3D7 version 3.0 reference  
164 genome (22) using HISAT2 (23). Gene transcript levels were assessed using the FPKM metric  
165 (Fragments Per Kilobase of transcript per Million mapped reads, the number of reads  
166 mapping to each gene normalised for the size of the sequencing library and for gene length).  
167 Data were analysed using the R package DESeq2 (24), using a masked GFF annotation file  
168 that removed the *var*, *rifin*, and *stevor* gene families from analysis, as described for analysis  
169 of previous schizont transcriptome data (10). In addition to exclusion of these three sub-

170 telomeric gene families from analysis, portions of other protein-coding genes that show high  
171 allelic diversity (including the highly polymorphic central region of the *mSPDBL2* gene) were  
172 masked to ensure mapping occurred only in conserved regions of those genes to minimise  
173 allelic bias among samples, as previously described for other data (10). Prior to analysis,  
174 three independent studies including proteomic or transcriptomic analyses were consulted  
175 (14, 25, 26) to identify *P. falciparum* genes considered to be potentially associated with  
176 gametocytogenesis, enabling compilation of a list of 119 genes (Supplementary Table S1)  
177 used as a set for conducting exploratory correlative analyses of the RNA-seq data within this  
178 study. To avoid discovery bias in the present study this needed to be a static list fixed prior  
179 to analysis, but is not a reference list for other studies as ongoing research means that any  
180 such compilations should be updated and can be subject to different criteria.

181

## 182 **Statistical analyses**

183 Tests for significance of correlations between different variables (including proportions of  
184 schizonts positive for MSPDBL2, and individual gene FPKM values), or estimations of odds  
185 ratios and significance of associations between categorical variables, were conducted using  
186 a combination of R, Epi-Info and Prism software. Differential gene expression analysis was  
187 carried out in DESeq2 (24), focusing on the distributions of derived FPKM values for each  
188 gene as defined above.

189

## 190 **Results**

191

### 192 **Wide variation in proportions of schizonts expressing MSPDBL2 in clinical isolates**

193 MSPDBL2 protein expression was examined in mature schizonts (each with at least eight  
194 nuclei) developed in the first cultured *ex vivo* cycle of each of 96 clinical isolates sampled  
195 from malaria patients in four different endemic countries in West Africa. In most isolates,  
196 less than 1% of all mature schizonts were positive for MSPDBL2 (overall median of 0.6%),  
197 but the frequency distribution was highly skewed as some had much higher proportions  
198 (Figure 1 and Supplementary Table S2). Nine isolates had more than 3% schizonts positive,  
199 including one that had 73% positive. There were no significant differences in the  
200 distributions among different countries (Kruskal-Wallis test and pairwise Mann-Whitney  
201 tests non-significant), although the two isolates with highest proportions were from Senegal

202 (Figure 1). The overall distribution was compared to that previously reported for a panel of  
203 12 long-term laboratory-adapted *P. falciparum* lines originally isolated from more diverse  
204 sources (6), and this was not significantly different (Mann-Whitney test,  $P = 0.52$ ). This  
205 shows that a wide range of MSPDBL2-positive schizonts, with most isolates having very low  
206 proportions positive, is a natural feature of expression in endemic *P. falciparum* populations  
207 rather than one which has been selected by laboratory culture.

208

### 209 **Transcriptomes of schizont-enriched *ex vivo* cultures with a wide range in proportions of** 210 **MSPDBL2-positive schizonts**

211 To explore whether particular parasite gene transcripts are associated with the proportions  
212 of MSPDBL2-positive frequencies, whole transcriptome RNA-seq analysis was performed for  
213 17 of the clinical isolates that had sufficient schizont-enriched material, representing a wide  
214 range of MSPDBL2 expression (zero to 73% of schizonts positive, Supplementary Table S1).  
215 Sequencing of the cDNA libraries yielded a mean of  $2.1 \times 10^6$  Illumina short reads for each  
216 isolate, and most of these reads aligned to the 3D7 reference genome sequence  
217 (Supplementary Table S3), enabling read depth analysis of relative expression of individual  
218 genes after normalisation for the total number of reads for each isolate (Supplementary  
219 Figure S1). The FPKM values across all genes were first compared to published RNA-seq data  
220 from tightly synchronised *P. falciparum* 3D7 parasites sampled at seven timepoints post  
221 invasion (0, 8, 16, 24, 32, 40, and 48 hours, the last of which may include some next cycle  
222 reinvasion) (27), confirming that Spearman's rank correlations expression profiles in all  
223 samples had strongest correlations with schizont stage parasites (13 isolates correlated  
224 most strongly with the 40-hour timepoint and four isolates with the 32-hour timepoint,  
225 Supplementary Figure S1).

226

### 227 **Gene transcripts correlating with variable proportions of MSPDBL2-positive schizonts** 228 **among clinical isolates**

229 Among the 17 isolates with RNA-seq data, individual gene FPKM relative expression values  
230 were tested for correlation with MSPDBL2 IFA expression. To scan for significantly  
231 correlated genes, a P value cut off of  $<0.001$  was used which identified 52 genes with  
232 increased expression (including the *mispdbl2* gene which was by far the most positively



233 correlated as expected, Supplementary Table S4), and 130 genes with negatively correlated  
234 expression (Supplementary Table S5). Aside from *mSPDBL2* itself, 12 (24%) of the other 51  
235 genes with higher expression were previously listed as having known or suspected roles in  
236 gametocytogenesis, whereas of the 130 genes with lower expression, only 10 (7%) were  
237 listed with known or suspected gametocytogenesis involvement. An odds ratio of 3.7 (95%  
238 CI, 1.5 - 9.2,  $P = 0.0054$ ) on these proportions indicates a significant skew in  
239 gametocytogenesis-related genes being more likely to be positively rather than negatively  
240 correlated with proportions of MSPDBL2-positive schizonts.

241

242 Using a more stringent correlation value cut off of  $P < 10^{-4}$  to focus on genes having most  
243 highly significant correlations with proportions of schizonts expressing MSPDBL2, 19 genes  
244 are identified as positively correlated, of which 9 (47%) were previously indicated as having  
245 known or suspected roles in gametocytogenesis (Table 1). At this level of correlation  
246 significance, 51 genes are negatively correlated (Supplementary Table S3), of which only one  
247 (2%) was previously indicated as gametocytogenesis-related. This indicates a very highly  
248 significant skew in gametocytogenesis-related genes being positively rather than negatively  
249 correlated with proportions of MSPDBL2-positive schizonts, yielding an odds ratio of 45.0  
250 (95% CI, 5.1 – 396.0,  $P = 1.2 \times 10^{-5}$ ).

251

252 Independently, a previous study has investigated the transcriptomic profiles of cultured  
253 schizonts of the transgenic *P. falciparum* parasite line 164/TdTom, comparing preparations  
254 enriched for sexually-committed versus asexually-committed schizonts (28). The data from  
255 this study on the PlasmoDB genomics resource site (29) shows relative transcript levels  
256 accessible for all except one of the 19 genes that were most highly positively correlated with  
257 MSPDBL2 expression in the present study. Fifteen (83%) of these 18 genes had higher  
258 expression in the sexually-committed schizont preparation compared to the asexual  
259 schizont preparation, a significantly positive skew compared to random expectations ( $P <$   
260 0.05).

261

262 **Genes expressed in correlation with *mSPDBL2* gene expression in schizont-enriched**  
263 **cultures of clinical isolates**

264 To complement the above scan based on proportions of MSPDBL2-positive schizonts, the  
265 varying transcript levels of *mSPDBL2* (FPKM values) among the clinical isolates were analysed  
266 to scan for other genes with correlated expression. Using a correlation significance value of  
267  $P < 0.001$  as cut-off identified 41 genes with positively correlated expression  
268 (Supplementary Table S6), many of which were also correlated with proportions of  
269 MSPDBL2-positive schizonts (16 correlated at  $P < 0.001$ , 30 correlated at  $P < 0.01$ ), and 31  
270 genes had negatively correlated expression (Supplementary Table S7).

271

272 Of the 41 genes positively correlated with *mSPDBL2* transcript expression, 11 (27%) were  
273 previously identified as potentially gametocytogenesis-related, in comparison to only 3  
274 (10%) of the 31 negatively correlated genes, giving an odds ratio of 3.4 (95% CI, 0.9 – 13.6,  $P$   
275 = 0.06). Using a higher level of cut-off for correlation significance ( $P < 10^{-4}$ ), 19 genes were  
276 positively correlated with transcript levels of *mSPDBL2* (Table 2), of which 8 (42%) were  
277 previously identified as potentially gametocytogenesis-related, in comparison to 2 (15%) of  
278 13 genes negatively associated with *mSPDBL2*, giving an odds ratio of 4.0 (95% CI, 0.7 – 23.3,  
279  $P = 0.11$ ). In summary, the analysis based on *mSPDBL2* transcript levels gives broadly similar  
280 results to the analysis based on MSPDBL2 positive schizont proportions, but the excess  
281 proportions of positively correlated gametocyte-related genes are less significant.

282

## 283 Discussion

284

285 This study shows that *P. falciparum* in diverse clinical isolates have a wide range of  
286 MSPDBL2 expression positivity in mature schizonts in the first *ex vivo* cycle of development,  
287 with most isolates having very low proportions positive. The frequency distribution is similar  
288 to that previously described for a smaller number of *P. falciparum* laboratory-adapted lines  
289 that had been cultured for many years (6), indicating that this is not a result of selection by  
290 culture adaptation. Furthermore, the frequency distribution was similar in isolates from  
291 each of the four populations sampled here, which have different levels of malaria infection  
292 endemicity within West Africa (20, 30), indicating that parasite populations maintain the  
293 wide range of MSPDBL2 expression variation within different endemic environments.

294

295 Results of the RNA-seq analyses here indicate that MSPDBL2 protein and gene expression in  
296 schizonts in the first cycle of development from clinical isolates is significantly correlated  
297 with the expression of other particular genes within the *ex vivo* cultures. Particularly, many  
298 of the most strongly correlated genes were previously implicated as having known or  
299 suspected involvement in the process of gametocytogenesis. This is consistent with  
300 expectations from a functional study on effects of the gametocyte development gene *gdv1*  
301 in assays of an engineered parasite line with highly induced expression of GDV1 (14), which  
302 showed significantly increased transcription of *ap2g* as expected, and also *mspdbl2*, as well  
303 as a PHISTa gene (PF3D7\_1477700). A separate study indicated that levels of the protein  
304 encoded by *pfg14\_748* increase as parasites develop along the gametocytogenesis pathway,  
305 being detectable alongside the early gametocytogenesis marker Pfs16 in parasite cultures  
306 before gametocytes were observed to develop (31). In the present study, *pfg14\_748* had  
307 expression strongly correlated with *mspdbl2*, but although it was previously shown to be  
308 induced by GDV1 (14) it is apparently not dependent on expression of AP2-G (25). Several  
309 other genes which correlated with *mspdbl2* expression in the present study (including the  
310 nucleoprotein gene *nup116*, and the early gametocyte development marker *gexp02*) have  
311 been identified as being upregulated by *ap2-g* (25), but *mspdbl2* was not itself identified to  
312 be upregulated by *ap2-g*.

313

314 Genes correlating with MSPDBL2 expression in clinical isolates include members of the GEXP  
315 family encoding proteins involved in protein export occurring during gametocytogenesis  
316 (26), particularly *gexp02* (PF3D7\_1102500) and *gexp04* (PF3D7\_1372100). As well as *gexp02*  
317 being known to result from induced *gdv1* expression (14), it has also been shown that  
318 *gexp02* is de-repressed in parasites which have conditional knock out of heterochromatin  
319 protein 1 (HP1), presumably due to the resulting activation of *gdv1* (32). However, the  
320 correlating expression with *gexp02* and other gametocytogenesis genes here does not  
321 indicate that *mspdbl2* is active in the process of sexual commitment or that it is a specific  
322 marker. It should be noted that relevant analysis of *gdv1* transcript levels are not possible  
323 from the double-stranded cDNA transcriptome data in the present study, as *gdv1* is usually  
324 repressed by abundant antisense transcripts initiated from the 3'-intergenic region (14, 33,  
325 34), and ratios of sense to antisense transcripts could only be determined by strand-specific  
326 sequencing.

327

328 Clearly, if *mSPDBL2* is directly involved in gametocytogenesis, it would be expected that *ap2-*  
329 *g* would be identified as differentially expressed in isolates with higher *mSPDBL2* expression.  
330 As this was not the case in this study, it is alternatively possible that the expression of  
331 *mSPDBL2* occurs in some parasites in parallel to the sexual commitment process. It is  
332 important to note that the correlation with some involved in gametocytogenesis in the  
333 present study is at the bulk transcriptome level, so that *mSPDBL2* expression might not be  
334 within the same individual parasites, but ones that tend to occur in the same bulk  
335 population. The only published single cell transcriptome data on *P. falciparum* schizonts are  
336 from a laboratory clone in which hardly any schizonts express MSPDBL2, so are not  
337 informative on co-expression between the *mSPDBL2* gene and others (6, 35). Future insights  
338 from single cell transcriptome data will require analysis of *P. falciparum* isolates that have a  
339 substantial proportion of schizonts expressing MSPDBL2.

340

341 Functional studies would be required to determine whether MSPDBL2 is in any way  
342 associated with the sexual commitment process, or whether it is only correlated at the  
343 population level within infections or within cultures due to being co-incidentally  
344 upregulated by *gdv1* (14). As MSPDBL2 is a merozoite surface protein expressed in late  
345 schizonts, the current study analysed transcriptomes of schizont-enriched preparations from  
346 *ex vivo* culture, as focused on in few other studies of *P. falciparum* clinical isolates (10, 36).  
347 Other studies have analysed parasite transcriptomes from the earlier stages of intra-  
348 erythrocytic development that are present in peripheral circulation (37-40), and a temporal  
349 analysis of parasite development through to mature schizonts may be needed to identify  
350 gene products with which MSPDBL2 is functionally linked, and resolve whether it is a marker  
351 of an important parasite subpopulation that could be targeted for vaccination.

352

### 353 **Acknowledgements**

354 We are grateful to the malaria patients and clinical staff for participation in the study. The  
355 sample collection was facilitated by staff at Kintampo Health Research Centre in Ghana, at  
356 the National Institute for Public Health in Guinea, at Nioro du Sahel Health Centre in Mali  
357 and at Pikine Health Centre in Senegal. We appreciate the support of colleagues at the  
358 Medical Research Council Unit in The Gambia, the Laboratory of Bacteriology and Virology,

359 Le Dantec Hospital in Senegal, The University of Bamako in Mali, Noguchi Memorial Institute  
360 for Medical Research and the University of Ghana, and the London School of Hygiene and  
361 Tropical Medicine in enabling this work. This study was supported by an ERC Advanced  
362 Award (grant AdG-2011-294428), a Leverhulme-Royal Society Africa Award (grant  
363 AA110050), a BBSRC PhD studentship within the London Interdisciplinary Doctoral Training  
364 Programme ([www.lido-dtp.ac.uk](http://www.lido-dtp.ac.uk)), and an MRC project grant (MR/S009760/1).  
365  
366

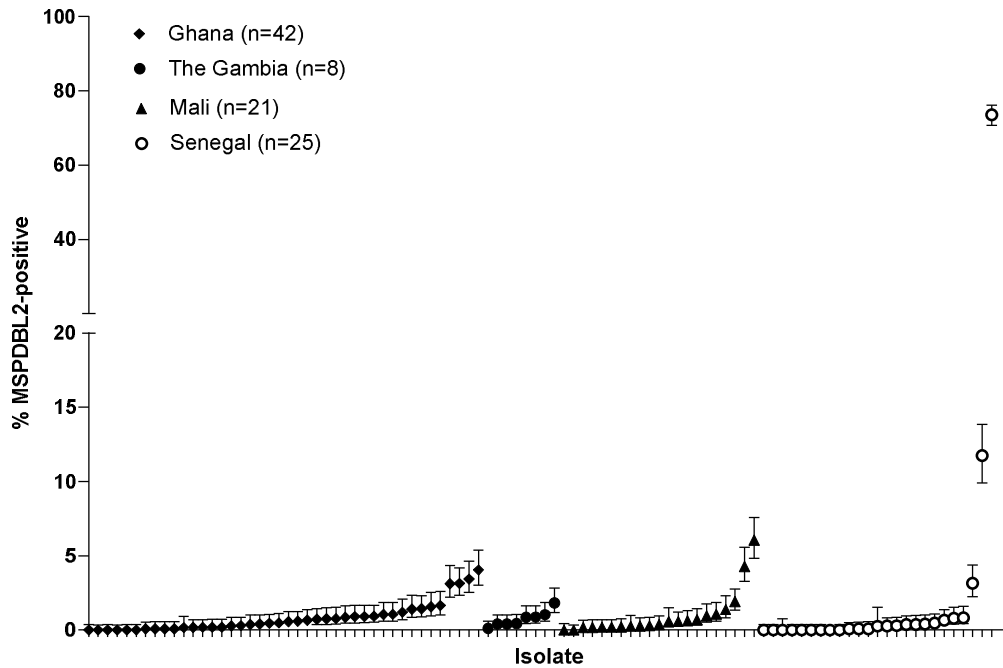

367

368 **Figure 1. Variable proportions of *P. falciparum* schizonts expressing MSPDBL2 in *ex vivo***  
369 **cultures of 96 clinical isolates from four West African countries.** Samples were from  
370 malaria patients in Ghana n=42, The Gambia n=8, Senegal n=25, and Mali n=21. In each  
371 isolate, approximately 1000 mature schizonts containing eight or more nuclei were scored in  
372 immunofluorescence assays using polyclonal mouse serum against a conserved N-terminal  
373 region of MSPDBL2. Eighteen of the isolates had no schizonts positive, and the median  
374 across all isolates was only 0.6%, but proportions were highly skewed and nine isolates had  
375 more than 3% of schizonts positive. Although the two isolates with highest proportions were  
376 from Senegal, there were no significant differences in the overall distributions among  
377 different countries by non-parametric rank sum tests.

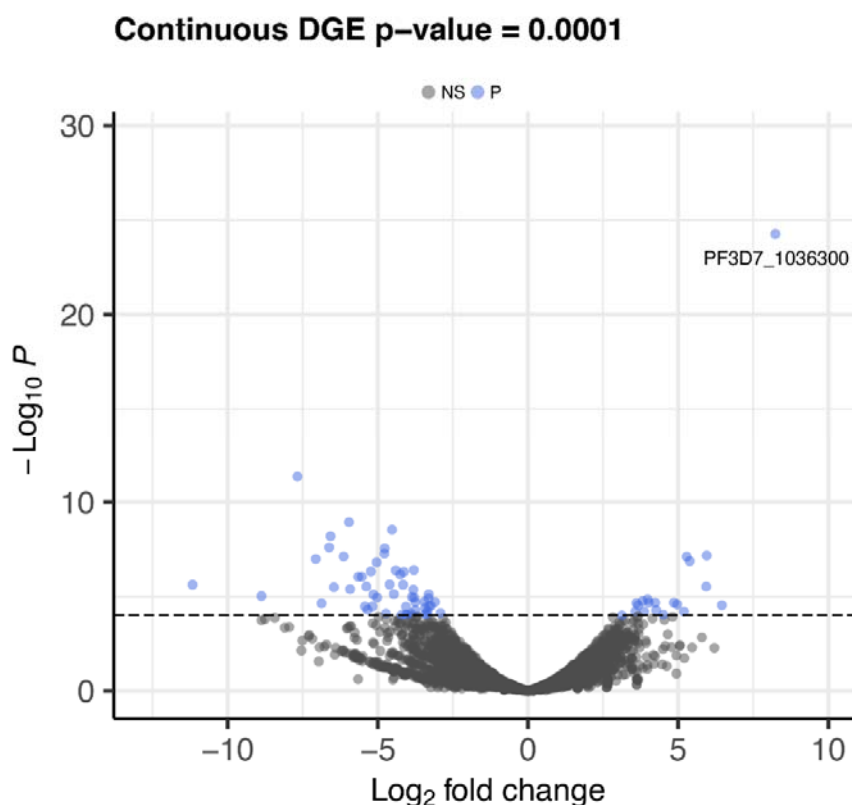

378

379 **Figure 2. Transcriptome analysis identifies *P. falciparum* genes showing correlation with**  
380 **MSPDBL2 expression in *ex vivo* cultured clinical isolates.** RNA-seq was performed on  
381 schizont-enriched cultures of 17 West African clinical isolate in the first *ex vivo* cycle, and  
382 across the isolates FPKM transcript levels of each gene were tested for correlation with the  
383 proportion of schizonts expressing MSPDBL2. Blue shading indicates those that have the  
384 most significant differential gene expression (DGE,  $P < 10^{-4}$ ), and genes positively correlated  
385 at this level of significance are listed in Table 1. A broader set of genes correlated positively  
386 at a slightly lower level of individual significance ( $P < 0.001$ , Supplementary Table S4), and  
387 those that are negatively correlated at that level of significance are also listed separately  
388 (Supplementary Table S5).

389 **Table 1. *P. falciparum* genes with most highly significantly increased expression ( $P < 10^{-4}$ )**  
 390 **correlating with proportions of MSPDBL2-positive schizonts in clinical isolates.**  
 391

| Gene ID              | P-value               | Gene product description                                        |
|----------------------|-----------------------|-----------------------------------------------------------------|
| <i>PF3D7_1036300</i> | $5.4 \times 10^{-25}$ | <i>duffy binding-like merozoite surface protein 2 (mspdbl2)</i> |
| <b>PF3D7_1476600</b> | $6.7 \times 10^{-08}$ | <i>Plasmodium</i> exported protein                              |
| PF3D7_1474000        | $7.6 \times 10^{-08}$ | conserved <i>Plasmodium</i> protein                             |
| <b>PF3D7_1102500</b> | $1.3 \times 10^{-07}$ | <i>gexp02</i> , <i>Plasmodium</i> exported protein (PHISTb)     |
| PF3D7_1461800        | $3.0 \times 10^{-06}$ | conserved <i>Plasmodium</i> protein                             |
| PF3D7_1445700        | $1.4 \times 10^{-05}$ | conserved <i>Plasmodium</i> protein                             |
| PF3D7_0814200        | $1.7 \times 10^{-05}$ | DNA/RNA-binding protein Alba 1                                  |
| <b>PF3D7_1466200</b> | $2.0 \times 10^{-05}$ | early gametocyte enriched phosphoprotein EGXP                   |
| <b>PF3D7_0114000</b> | $2.1 \times 10^{-05}$ | GEXP06, exported protein family 1                               |
| <b>PF3D7_1372100</b> | $2.1 \times 10^{-05}$ | <i>Plasmodium</i> exported protein (PHISTb)                     |
| <b>PF3D7_0215000</b> | $2.2 \times 10^{-05}$ | acyl-CoA synthetase                                             |
| PF3D7_1362700        | $2.6 \times 10^{-05}$ | conserved <i>Plasmodium</i> protein                             |
| <b>PF3D7_1473700</b> | $2.8 \times 10^{-05}$ | nucleoporin NUP116/NSP116, putative                             |
| PF3D7_0829400        | $2.8 \times 10^{-05}$ | prolyl 4-hydroxylase subunit alpha, putative                    |
| PF3D7_1027300        | $5.2 \times 10^{-05}$ | Peroxiredoxin, nuclear protein                                  |
| PF3D7_0515000        | $6.2 \times 10^{-05}$ | pre-mRNA-splicing factor CWC2, putative                         |
| <b>PF3D7_1346800</b> | $6.2 \times 10^{-05}$ | Pfs47, 6-cysteine protein                                       |
| PF3D7_1132600        | $6.4 \times 10^{-05}$ | pre-mRNA-splicing factor 38A, putative                          |
| <b>PF3D7_1477700</b> | $9.1 \times 10^{-05}$ | <i>Pfg14.748</i> , <i>Plasmodium</i> exported protein (PHISTa)  |
| PF3D7_1431400        | $9.9 \times 10^{-05}$ | surface-related antigen SRA                                     |

392  
 393 The most highly correlated transcript is *mspdbl2* itself, as expected. Of the other 19 most  
 394 significantly correlated genes, 9 (47%) highlighted in bold were previously implicated as  
 395 potentially gametocytogenesis-related (Supplementary Table S1). Additional genes that  
 396 positively correlated at the  $P < 0.001$  significance level are listed in Supplementary Table S4.



397 **Table 2. *P. falciparum* genes with most significantly increased expression ( $P < 10^{-4}$ )**  
398 **correlating with *mSPDBL2* transcript levels measured by FPKM in transcriptomes of clinical**  
399 **isolates.**  
400

| Gene ID               | P-value              | Gene product description                      |
|-----------------------|----------------------|-----------------------------------------------|
| <b>PF3D7_0114000*</b> | $2.6 \times 10^{-9}$ | GEXP06, exported protein family 1             |
| PF3D7_1362700*        | $2.6 \times 10^{-8}$ | conserved <i>Plasmodium</i> protein           |
| <b>PF3D7_1466200*</b> | $2.2 \times 10^{-7}$ | early gametocyte enriched phosphoprotein EGXP |
| <b>PF3D7_1472200</b>  | $3.1 \times 10^{-7}$ | histone deacetylase, putative                 |
| <b>PF3D7_1467600*</b> | $6.0 \times 10^{-7}$ | conserved <i>Plasmodium</i> protein           |
| PF3D7_0214300*        | $1.1 \times 10^{-6}$ | conserved <i>Plasmodium</i> protein           |
| PF3D7_1027300*        | $2.3 \times 10^{-6}$ | peroxiredoxin                                 |
| PF3D7_1461800*        | $2.5 \times 10^{-6}$ | conserved <i>Plasmodium</i> protein           |
| <b>PF3D7_1473700*</b> | $2.9 \times 10^{-6}$ | nucleoporin NUP116/NSP116, put                |
| PF3D7_1361200*        | $8.4 \times 10^{-6}$ | conserved <i>Plasmodium</i> protein           |
| PF3D7_1474000*        | $1.0 \times 10^{-5}$ | conserved <i>Plasmodium</i> protein           |
| PF3D7_0501400         | $1.5 \times 10^{-5}$ | interspersed repeat antigen                   |
| <b>PF3D7_0801900</b>  | $2.0 \times 10^{-5}$ | lysine-specific histone demethylase, put      |
| <b>PF3D7_1408200</b>  | $4.9 \times 10^{-5}$ | AP2 domain transcription factor AP2-G2        |
| PF3D7_0207800         | $5.3 \times 10^{-5}$ | serine repeat antigen 3                       |
| PF3D7_1235300         | $7.1 \times 10^{-5}$ | CCR4-NOT transcription complex s4, putative   |
| PF3D7_0519500         | $7.4 \times 10^{-5}$ | CCR4 domain-containing protein 1, putative    |
| PF3D7_1228300         | $7.5 \times 10^{-5}$ | NIMA related kinase 1                         |
| <b>PF3D7_1134600</b>  | $8.7 \times 10^{-5}$ | zinc finger protein, putative                 |

401

402 Genes highlighted bold have known or suspected roles in gametocytogenesis (indicated by  
403 prior listing from previous studies, Supplementary Table S1). \* indicates genes that were  
404 also identified as having higher expression correlating to MSPDBL2 protein expression in  
405 schizonts at significance of  $P < 0.001$  (Supplementary Table S4).

406 **References**

407

- 408 1. Hodder AN, Czabotar PE, Uboldi AD, Clarke OB, Lin CS, Healer J, Smith BJ,  
409 Cowman AF. 2012. Insights into Duffy binding-like domains through the crystal  
410 structure and function of the merozoite surface protein MSPDBL2 from *Plasmodium*  
411 *falciparum*. *J Biol Chem* 287:32922-39.
- 412 2. Singh S, Soe S, Weisman S, Barnwell JW, Perignon JL, Druilhe P. 2009. A conserved  
413 multi-gene family induces cross-reactive antibodies effective in defense against  
414 *Plasmodium falciparum*. *PLoS One* 4:e5410.
- 415 3. Ochola LI, Tetteh KK, Stewart LB, Riitho V, Marsh K, Conway DJ. 2010. Allele  
416 frequency-based and polymorphism-versus-divergence indices of balancing selection  
417 in a new filtered set of polymorphic genes in *Plasmodium falciparum*. *Mol Biol Evol*  
418 27:2344-51.
- 419 4. Otto TD, Rayner JC, Bohme U, Pain A, Spottiswoode N, Sanders M, Quail M,  
420 Ollomo B, Renaud F, Thomas AW, Prugnolle F, Conway DJ, Newbold C, Berriman  
421 M. 2014. The genomes of chimpanzee malaria parasites reveal possible pathways of  
422 adaptation to human hosts. *Nature Communications* 5:4754.
- 423 5. Otto TD, Bohme U, Sanders M, Reid A, Bruske EI, Duffy CW, Bull PC, Pearson RD,  
424 Abdi A, Dimonte S, Stewart LB, Campino S, Kekre M, Hamilton WL, Claessens A,  
425 Volkman SK, Ndiaye D, Amambua-Ngwa A, Diakite M, Fairhurst RM, Conway DJ,  
426 Franck M, Newbold CI, Berriman M. 2018. Long read assemblies of geographically  
427 dispersed *Plasmodium falciparum* isolates reveal highly structured subtelomeres.  
428 *Wellcome Open Res* 3:52.
- 429 6. Amambua-Ngwa A, Tetteh KK, Manske M, Gomez-Escobar N, Stewart LB,  
430 Deerhake ME, Cheeseman IH, Newbold CI, Holder AA, Knuepfer E, Janha O, Jallow  
431 M, Campino S, Macinnis B, Kwiatkowski DP, Conway DJ. 2012. Population genomic  
432 scan for candidate signatures of balancing selection to guide antigen characterization  
433 in malaria parasites. *PLoS Genet* 8:e1002992.
- 434 7. Mobegi VA, Duffy CW, Amambua-Ngwa A, Loua KM, Laman E, Nwakanma DC,  
435 MacInnis B, Aspelng-Jones H, Murray L, Clark TG, Kwiatkowski DP, Conway DJ.  
436 2014. Genome-wide analysis of selection on the malaria parasite *Plasmodium*  
437 *falciparum* in West African populations of differing infection endemicity. *Mol Biol*  
438 *Evol* 31:1490-9.
- 439 8. Tetteh KK, Osier FH, Salanti A, Kamuyu G, Drought L, Faily M, Martin C, Marsh  
440 K, Conway DJ. 2013. Analysis of antibodies to newly described *Plasmodium*  
441 *falciparum* merozoite antigens supports MSPDBL2 as a predicted target of naturally  
442 acquired immunity. *Infect Immun* 81:3835-42.
- 443 9. Chiu CY, Hodder AN, Lin CS, Hill DL, Li Wai Suen CS, Schofield L, Siba PM,  
444 Mueller I, Cowman AF, Hansen DS. 2015. Antibodies to the *Plasmodium falciparum*  
445 proteins MSPDBL1 and MSPDBL2 opsonize merozoites, inhibit parasite growth, and  
446 predict protection from clinical malaria. *J Infect Dis* 212:406-415.
- 447 10. Tarr SJ, Diaz-Ingelmo O, Stewart LB, Hocking SE, Murray L, Duffy CW, Otto TD,  
448 Chappell L, Rayner JC, Awandare GA, Conway DJ. 2018. Schizont transcriptome  
449 variation among clinical isolates and laboratory-adapted clones of the malaria parasite  
450 *Plasmodium falciparum*. *BMC Genomics* 19:894.
- 451 11. Zhang M, Wang C, Otto TD, Oberstaller J, Liao X, Adapa SR, Udenze K, Bronner IF,  
452 Casandra D, Mayho M, Brown J, Li S, Swanson J, Rayner JC, Jiang RHY, Adams JH.  
453 2018. Uncovering the essential genes of the human malaria parasite *Plasmodium*  
454 *falciparum* by saturation mutagenesis. *Science* 360.

- 455 12. Crosnier C, Iqbal Z, Knuepfer E, Maciuca S, Perrin AJ, Kamuyu G, Goulding D,  
456 Bustamante LY, Miles A, Moore SC, Dougan G, Holder AA, Kwiatkowski DP,  
457 Rayner JC, Pleass RJ, Wright GJ. 2016. Binding of *Plasmodium falciparum*  
458 Merozoite Surface Proteins DBLMSP and DBLMSP2 to Human Immunoglobulin M  
459 Is Conserved among Broadly Diverged Sequence Variants. *J Biol Chem* 291:14285-  
460 14299.
- 461 13. Van Tyne D, Uboldi AD, Healer J, Cowman AF, Wirth DF. 2013. Modulation of  
462 PF10\_0355 (MSPDBL2) alters *Plasmodium falciparum* response to antimalarial  
463 drugs. *Antimicrob Agents Chemother* 57:2937-41.
- 464 14. Filarsky M, Frasnica SA, Niederwieser I, Brancucci NMB, Carrington E, Carrio E,  
465 Moes S, Jenoe P, Bartfai R, Voss TS. 2018. GDV1 induces sexual commitment of  
466 malaria parasites by antagonizing HP1-dependent gene silencing. *Science* 359:1259-  
467 1263.
- 468 15. Usui M, Prajapati SK, Ayanful-Torgby R, Acquah FK, Cudjoe E, Kakaney C,  
469 Amponsah JA, Obboh EK, Reddy DK, Barbeau MC, Simons LM, Czesny B,  
470 Raiciulescu S, Olsen C, Abuaku BK, Amoah LE, Williamson KC. 2019. *Plasmodium*  
471 *falciparum* sexual differentiation in malaria patients is associated with host factors  
472 and GDV1-dependent genes. *Nat Commun* 10:2140.
- 473 16. Prajapati SK, Ayanful-Torgby R, Pava Z, Barbeau MC, Acquah FK, Cudjoe E,  
474 Kakaney C, Amponsah JA, Obboh E, Ahmed AE, Abuaku BK, McCarthy JS, Amoah  
475 LE, Williamson KC. 2020. The transcriptome of circulating sexually committed  
476 *Plasmodium falciparum* ring stage parasites forecasts malaria transmission potential.  
477 *Nat Commun* 11:6159.
- 478 17. Kafsack BF, Rovira-Graells N, Clark TG, Bancells C, Crowley VM, Campino SG,  
479 Williams AE, Drought LG, Kwiatkowski DP, Baker DA, Cortes A, Llinas M. 2014. A  
480 transcriptional switch underlies commitment to sexual development in malaria  
481 parasites. *Nature* 507:248-52.
- 482 18. Bancells C, Llorca-Battle O, Poran A, Notzel C, Rovira-Graells N, Elemento O,  
483 Kafsack BFC, Cortes A. 2019. Revisiting the initial steps of sexual development in  
484 the malaria parasite *Plasmodium falciparum*. *Nat Microbiol* 4:144-154.
- 485 19. Llorca-Battle O, Michel-Todo L, Witmer K, Toda H, Fernandez-Becerra C, Baum J,  
486 Cortes A. 2020. Conditional expression of PfAP2-G for controlled massive sexual  
487 conversion in *Plasmodium falciparum*. *Sci Adv* 6:eaaz5057.
- 488 20. Duffy CW, Amambua-Ngwa A, Ahouidi AD, Diakite M, Awandare GA, Ba H, Tarr  
489 SJ, Murray L, Stewart LB, D'Alessandro U, Otto TD, Kwiatkowski DP, Conway DJ.  
490 2018. Multi-population genomic analysis of malaria parasites indicates local selection  
491 and differentiation at the *gdl1* locus regulating sexual development. *Sci Rep* 8:15763.
- 492 21. Bowyer PW, Stewart LB, Aspeling-Jones H, Mensah-Brown HE, Ahouidi AD,  
493 Amambua-Ngwa A, Awandare GA, Conway DJ. 2015. Variation in *Plasmodium*  
494 *falciparum* erythrocyte invasion phenotypes and merozoite ligand gene expression  
495 across different populations in areas of malaria endemicity. *Infect Immun* 83:2575-82.
- 496 22. Bohme U, Otto TD, Sanders M, Newbold CI, Berriman M. 2019. Progression of the  
497 canonical reference malaria parasite genome from 2002-2019. *Wellcome Open Res*  
498 4:58.
- 499 23. Kim D, Langmead B, Salzberg SL. 2015. HISAT: a fast spliced aligner with low  
500 memory requirements. *Nat Methods* 12:357-60.
- 501 24. Love MI, Huber W, Anders S. 2014. Moderated estimation of fold change and  
502 dispersion for RNA-seq data with DESeq2. *Genome Biol* 15:550.

- 503 25. Josling GA, Russell TJ, Venezia J, Orchard L, van Biljon R, Painter HJ, Llinas M.  
504 2020. Dissecting the role of PfAP2-G in malaria gametocytogenesis. *Nat Commun*  
505 11:1503.
- 506 26. Silvestrini F, Lasonder E, Olivieri A, Camarda G, van Schaijk B, Sanchez M, Younis  
507 Younis S, Sauerwein R, Alano P. 2010. Protein export marks the early phase of  
508 gametocytogenesis of the human malaria parasite *Plasmodium falciparum*. *Mol Cell*  
509 *Proteomics* 9:1437-48.
- 510 27. Otto TD, Wilinski D, Assefa S, Keane TM, Sarry LR, Bohme U, Lemieux J, Barrell  
511 B, Pain A, Berriman M, Newbold C, Llinas M. 2010. New insights into the blood-  
512 stage transcriptome of *Plasmodium falciparum* using RNA-Seq. *Mol Microbiol*  
513 76:12-24.
- 514 28. Pelle KG, Oh K, Buchholz K, Narasimhan V, Joice R, Milner DA, Brancucci NM,  
515 Ma S, Voss TS, Ketman K, Seydel KB, Taylor TE, Barteneva NS, Huttenhower C,  
516 Marti M. 2015. Transcriptional profiling defines dynamics of parasite tissue  
517 sequestration during malaria infection. *Genome Med* 7:19.
- 518 29. Aurecochea C, Brestelli J, Brunk BP, Dommer J, Fischer S, Gajria B, Gao X,  
519 Gingle A, Grant G, Harb OS, Heiges M, Innamorato F, Iodice J, Kissinger JC,  
520 Kraemer E, Li W, Miller JA, Nayak V, Pennington C, Pinney DF, Roos DS, Ross C,  
521 Stoeckert CJ, Jr., Treatman C, Wang H. 2009. PlasmoDB: a functional genomic  
522 database for malaria parasites. *Nucleic Acids Res* 37:D539-43.
- 523 30. WHO. 2021. World Malaria Report 2021. Geneva.
- 524 31. Eksi S, Haile Y, Furuya T, Ma L, Su X, Williamson KC. 2005. Identification of a  
525 subtelomeric gene family expressed during the asexual-sexual stage transition in  
526 *Plasmodium falciparum*. *Mol Biochem Parasitol* 143:90-9.
- 527 32. Brancucci NMB, Bertschi NL, Zhu L, Niederwieser I, Chin WH, Wampfler R,  
528 Freymond C, Rottmann M, Felger I, Bozdech Z, Voss TS. 2014. Heterochromatin  
529 protein 1 secures survival and transmission of malaria parasites. *Cell Host Microbe*  
530 16:165-176.
- 531 33. Broadbent KM, Broadbent JC, Ribacke U, Wirth D, Rinn JL, Sabeti PC. 2015.  
532 Strand-specific RNA sequencing in *Plasmodium falciparum* malaria identifies  
533 developmentally regulated long non-coding RNA and circular RNA. *BMC Genomics*  
534 16:454.
- 535 34. Lopez-Barragan MJ, Lemieux J, Quinones M, Williamson KC, Molina-Cruz A, Cui  
536 K, Barillas-Mury C, Zhao K, Su XZ. 2011. Directional gene expression and antisense  
537 transcripts in sexual and asexual stages of *Plasmodium falciparum*. *BMC Genomics*  
538 12:587.
- 539 35. Howick VM, Russell AJC, Andrews T, Heaton H, Reid AJ, Natarajan K, Butungi H,  
540 Metcalf T, Verzier LH, Rayner JC, Berriman M, Herren JK, Billker O, Hemberg M,  
541 Talman AM, Lawniczak MKN. 2019. The Malaria Cell Atlas: Single parasite  
542 transcriptomes across the complete *Plasmodium* life cycle. *Science* 365.
- 543 36. Lemieux JE, Gomez-Escobar N, Feller A, Carret C, Amambua-Ngwa A, Pinches R,  
544 Day F, Kyes SA, Conway DJ, Holmes CC, Newbold CI. 2009. Statistical estimation  
545 of cell-cycle progression and lineage commitment in *Plasmodium falciparum* reveals  
546 a homogeneous pattern of transcription in *ex vivo* culture. *Proc Natl Acad Sci U S A*  
547 106:7559-64.
- 548 37. Daily JP, Scanfeld D, Pochet N, Le Roch K, Plouffe D, Kamal M, Sarr O, Mboup S,  
549 Ndir O, Wypij D, Levasseur K, Thomas E, Tamayo P, Dong C, Zhou Y, Lander ES,  
550 Ndiaye D, Wirth D, Winzeler EA, Mesirov JP, Regev A. 2007. Distinct physiological  
551 states of *Plasmodium falciparum* in malaria-infected patients. *Nature* 450:1091-5.

- 552 38. Lee HJ, Georgiadou A, Walther M, Nwakanma D, Stewart LB, Levin M, Otto TD,  
553 Conway DJ, Coin LJ, Cunnington AJ. 2018. Integrated pathogen load and dual  
554 transcriptome analysis of systemic host-pathogen interactions in severe malaria. *Sci*  
555 *Transl Med* 10.
- 556 39. Yamagishi J, Natori A, Tolba ME, Mongan AE, Sugimoto C, Katayama T,  
557 Kawashima S, Makalowski W, Maeda R, Eshita Y, Tuda J, Suzuki Y. 2014.  
558 Interactive transcriptome analysis of malaria patients and infecting *Plasmodium*  
559 *falciparum*. *Genome Res* 24:1433-44.
- 560 40. Mok S, Ashley EA, Ferreira PE, Zhu L, Lin Z, Yeo T, Chotivanich K, Imwong M,  
561 Pukrittayakamee S, Dhorda M, Nguon C, Lim P, Amaratunga C, Suon S, Hien TT,  
562 Htut Y, Faiz MA, Onyamboko MA, Mayxay M, Newton PN, Tripura R, Woodrow  
563 CJ, Miotto O, Kwiatkowski DP, Nosten F, Day NP, Preiser PR, White NJ, Dondorp  
564 AM, Fairhurst RM, Bozdech Z. 2015. Population transcriptomics of human malaria  
565 parasites reveals the mechanism of artemisinin resistance. *Science* 347:431-5.  
566
